# Supplementary material for: Aging Uncouples Heritability and Expression-QTL in Caenorhabditis elegans
Source: PubMed Central journal article supplement (PMC3362942; doi:10.1534/g3.112.002212), 2012-05-01
Supplement: supp_2.5.597_FigureS4.pdf [file supp_2.5.597_FigureS4.pdf]

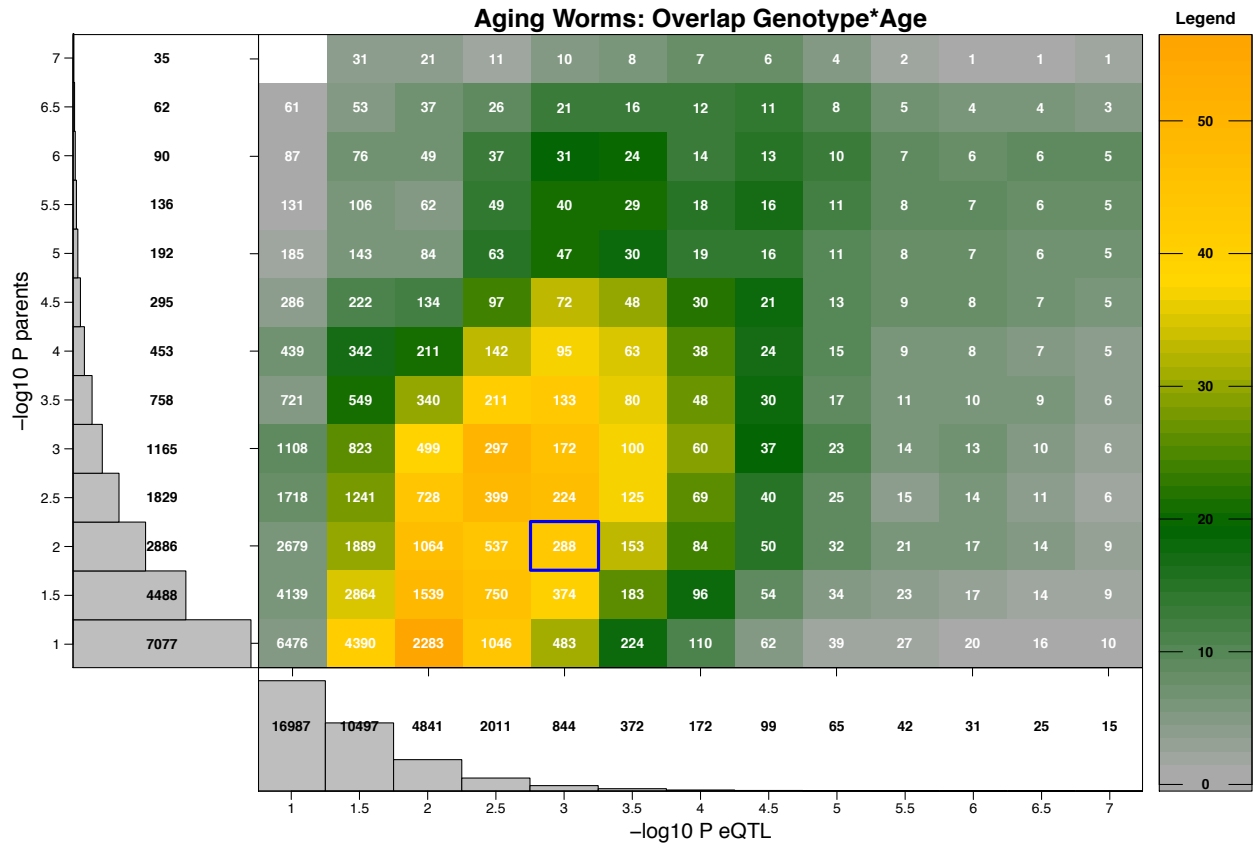

**Figure S4** Number of overlapping genes between differentially expressed genes in the parental strains and with at least an eQTL at different thresholds in old worms with genotype\*age interacting effect. See Figure S1 legend for details.
