# Supplementary material for: Aging Uncouples Heritability and Expression-QTL in Caenorhabditis elegans
Source: PubMed Central journal article supplement (PMC3362942; doi:10.1534/g3.112.002212), 2012-05-01
Supplement: supp_2.5.597_TableS6.pdf [file supp_2.5.597_TableS6.pdf]

**Table S6 Table summary with GO terms enrichment analysis summary for highly heritable genes in developing and aging worms.** First table shows GO terms significantly enriched in both groups of genes with a P-value < 0.01. Second table shows GO terms significantly enriched (P-value < 0.01) in developing worms genes but not in aging worms. Third table shows GO terms significantly enriched (P-value < 0.01) in aging worms genes but not in developing worms

| Common Go Terms enriched in Developing and Aging worms highly heritable genes |             |       |         |                                                    |
|-------------------------------------------------------------------------------|-------------|-------|---------|----------------------------------------------------|
| GO terms                                                                      | Genes in GO | Genes | P-value | Description                                        |
| GO:0004030                                                                    | 4           | 4     | 0       | aldehyde dehydrogenase [NAD(P)+] activity          |
| GO:0006081                                                                    | 4           | 4     | 0       | cellular aldehyde metabolic process                |
| GO:0016763                                                                    | 6           | 6     | 0       | transferase activity, transferring pentosyl groups |
| GO:0051020                                                                    | 6           | 6     | 0       | GTPase binding                                     |
| GO:0042302                                                                    | 309         | 191   | 0.00266 | structural constituent of cuticle                  |

| Go Terms enriched only in Developing worms highly heritable genes |             |       |          |                                                              |
|-------------------------------------------------------------------|-------------|-------|----------|--------------------------------------------------------------|
| GO terms                                                          | Genes in GO | Genes | P-value  | Description                                                  |
| GO:0000795                                                        | 4           | 4     | 0        | synaptonemal complex                                         |
| GO:0006544                                                        | 4           | 4     | 0        | glycine metabolic process                                    |
| GO:0007611                                                        | 4           | 4     | 0        | learning or memory                                           |
| GO:0008176                                                        | 4           | 4     | 0        | tRNA (guanine-N7-)-methyltransferase activity                |
| GO:0016328                                                        | 4           | 4     | 0        | lateral plasma membrane                                      |
| GO:0016358                                                        | 4           | 4     | 0        | dendrite development                                         |
| GO:0016471                                                        | 4           | 4     | 0        | vacuolar proton-transporting V-type ATPase complex           |
| GO:0018738                                                        | 4           | 4     | 0        | S-formylglutathione hydrolase activity                       |
| GO:0045773                                                        | 4           | 4     | 0        | positive regulation of axon extension                        |
| GO:0060102                                                        | 4           | 4     | 0        | collagen and cuticulin-based cuticle extracellular matrix    |
| GO:0000104                                                        | 5           | 5     | 0        | succinate dehydrogenase activity                             |
| GO:0005581                                                        | 5           | 5     | 0        | collagen                                                     |
| GO:0003896                                                        | 6           | 6     | 0        | DNA primase activity                                         |
| GO:0006269                                                        | 6           | 6     | 0        | DNA replication, synthesis of RNA primer                     |
| GO:0030071                                                        | 6           | 6     | 0        | regulation of mitotic metaphase/anaphase transition          |
| GO:0044249                                                        | 6           | 6     | 0        | cellular biosynthetic process                                |
| GO:0004926                                                        | 9           | 9     | 0        | non-G-protein coupled 7TM receptor activity                  |
| GO:0005744                                                        | 8           | 7     | 0.007421 | mitochondrial inner membrane presequence translocase complex |
| GO:0015085                                                        | 8           | 7     | 0.007421 | calcium ion transmembrane transporter activity               |
| GO:0016538                                                        | 8           | 7     | 0.007421 | cyclin-dependent protein kinase regulator activity           |
| GO:0032580                                                        | 8           | 7     | 0.007421 | Golgi cisterna membrane                                      |

|            |     |     |          |                                      |
|------------|-----|-----|----------|--------------------------------------|
| GO:0005388 | 12  | 11  | 0.000639 | calcium-transporting ATPase activity |
| GO:0005604 | 14  | 12  | 0.002407 | basement membrane                    |
| GO:0000776 | 14  | 13  | 0.000187 | kinetochore                          |
| GO:0004091 | 17  | 14  | 0.003357 | carboxylesterase activity            |
| GO:0008233 | 50  | 35  | 0.007561 | peptidase activity                   |
| GO:0005198 | 297 | 181 | 0.007627 | structural molecule activity         |
| GO:0010171 | 734 | 428 | 0.009828 | body morphogenesis                   |

---

Go Terms enriched only in Aging worms highly heritable genes

---

| GO terms   | Genes in GO | Genes | P-value  | Description                                                          |
|------------|-------------|-------|----------|----------------------------------------------------------------------|
| GO:0015485 | 4           | 4     | 0        | cholesterol binding                                                  |
| GO:0004657 | 6           | 5     | 0.004131 | proline dehydrogenase activity                                       |
| GO:0004768 | 5           | 5     | 0        | stearoyl-CoA 9-desaturase activity                                   |
| GO:0006562 | 6           | 5     | 0.004131 | proline catabolic process                                            |
| GO:0006937 | 6           | 5     | 0.004131 | regulation of muscle contraction                                     |
| GO:0010085 | 6           | 5     | 0.004131 | polarity specification of proximal/distal axis                       |
| GO:0032504 | 5           | 5     | 0        | multicellular organism reproduction                                  |
| GO:0006537 | 8           | 6     | 0.008598 | glutamate biosynthetic process                                       |
| GO:0004611 | 8           | 7     | 0.000662 | phosphoenolpyruvate carboxykinase activity                           |
| GO:0005882 | 8           | 7     | 0.000662 | intermediate filament                                                |
| GO:0006505 | 9           | 7     | 0.00384  | GPI anchor metabolic process                                         |
| GO:0017076 | 8           | 7     | 0.000662 | purine nucleotide binding                                            |
| GO:0043073 | 9           | 7     | 0.00384  | germ cell nucleus                                                    |
| GO:0004368 | 10          | 8     | 0.001697 | glycerol-3-phosphate dehydrogenase activity                          |
| GO:0009331 | 10          | 8     | 0.001697 | glycerol-3-phosphate dehydrogenase complex                           |
| GO:0034607 | 11          | 8     | 0.005989 | turning behavior involved in mating                                  |
| GO:0004652 | 12          | 9     | 0.002843 | polynucleotide adenylyltransferase activity                          |
| GO:0006072 | 13          | 9     | 0.007881 | glycerol-3-phosphate metabolic process                               |
| GO:0043631 | 12          | 9     | 0.002843 | RNA polyadenylation                                                  |
| GO:0005262 | 15          | 10    | 0.009457 | calcium channel activity                                             |
| GO:0006094 | 13          | 11    | 0.000139 | gluconeogenesis                                                      |
| GO:0016831 | 25          | 16    | 0.004391 | carboxy-lyase activity                                               |
| GO:0031625 | 26          | 16    | 0.007977 | ubiquitin protein ligase binding                                     |
| GO:0000122 | 27          | 17    | 0.004688 | negative regulation of transcription from RNA polymerase II promoter |
| GO:0004518 | 34          | 23    | 0.000305 | nuclease activity                                                    |
| GO:0001703 | 74          | 40    | 0.005349 | gastrulation with mouth forming first                                |
| GO:0004713 | 809         | 359   | 0.004876 | protein tyrosine kinase activity                                     |

|            |      |     |          |                                          |
|------------|------|-----|----------|------------------------------------------|
| GO:0004672 | 902  | 403 | 0.001747 | protein kinase activity                  |
| GO:0004674 | 958  | 427 | 0.001619 | protein serine/threonine kinase activity |
| GO:0006468 | 1013 | 452 | 0.001099 | protein amino acid phosphorylation       |
| GO:0005524 | 2060 | 879 | 0.00497  | ATP binding                              |
| GO:0009790 | 2334 | 992 | 0.004822 | embryonic development                    |

---
