# Supplementary material for: Aging Uncouples Heritability and Expression-QTL in Caenorhabditis elegans
Source: G3 (Bethesda). 2012 May 1;2(5):597–605. doi: 10.1534/g3.112.002212 (PMC3362942; doi:10.1534/g3.112.002212)
Supplement: Supporting Information [file supp_2.5.597_002212SI.pdf]

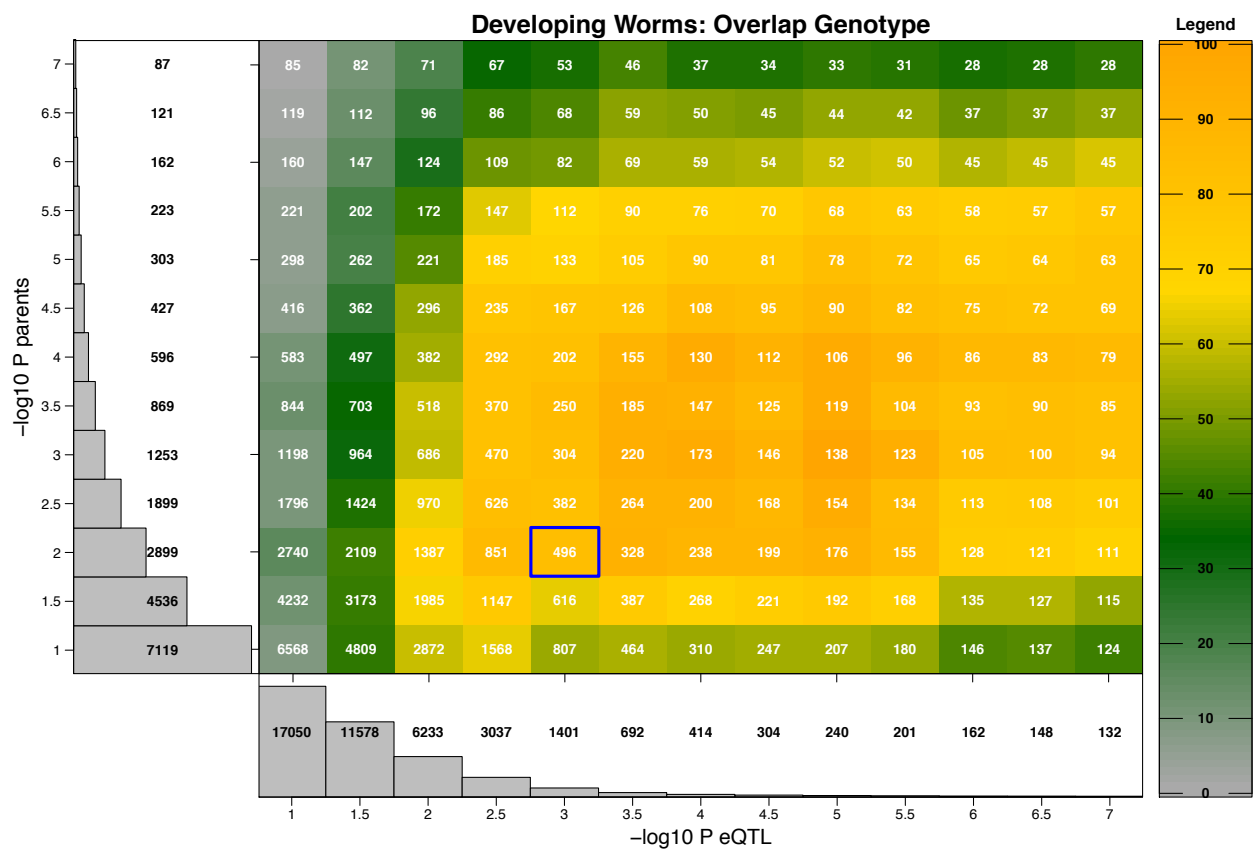

**Figure S1** Number of overlapping genes between differentially expressed genes in the parental strains and with at least an eQTL at different thresholds in developing worms with genotype effect. *Bottom bar graphs* show number of genes with at least an eQTL at different thresholds (from  $-\log_{10}$  P-value = 1 to  $-\log_{10}$  P-value = 7). *Left bar graphs* show number of differentially expressed genes between parental strains at different thresholds. The number of overlapping genes is shown in the *center graph*. The dark square indicates the number of overlapping genes at the joined-FDR ( $-\log_{10}$  P-value = 3 for eQTL analysis,  $-\log_{10}$  P-value = 2 for parental strains analysis). A hypergeometric test was used to determine significance of the overlapping genes. The color legends for the significance are shown at the *Right graphs*.

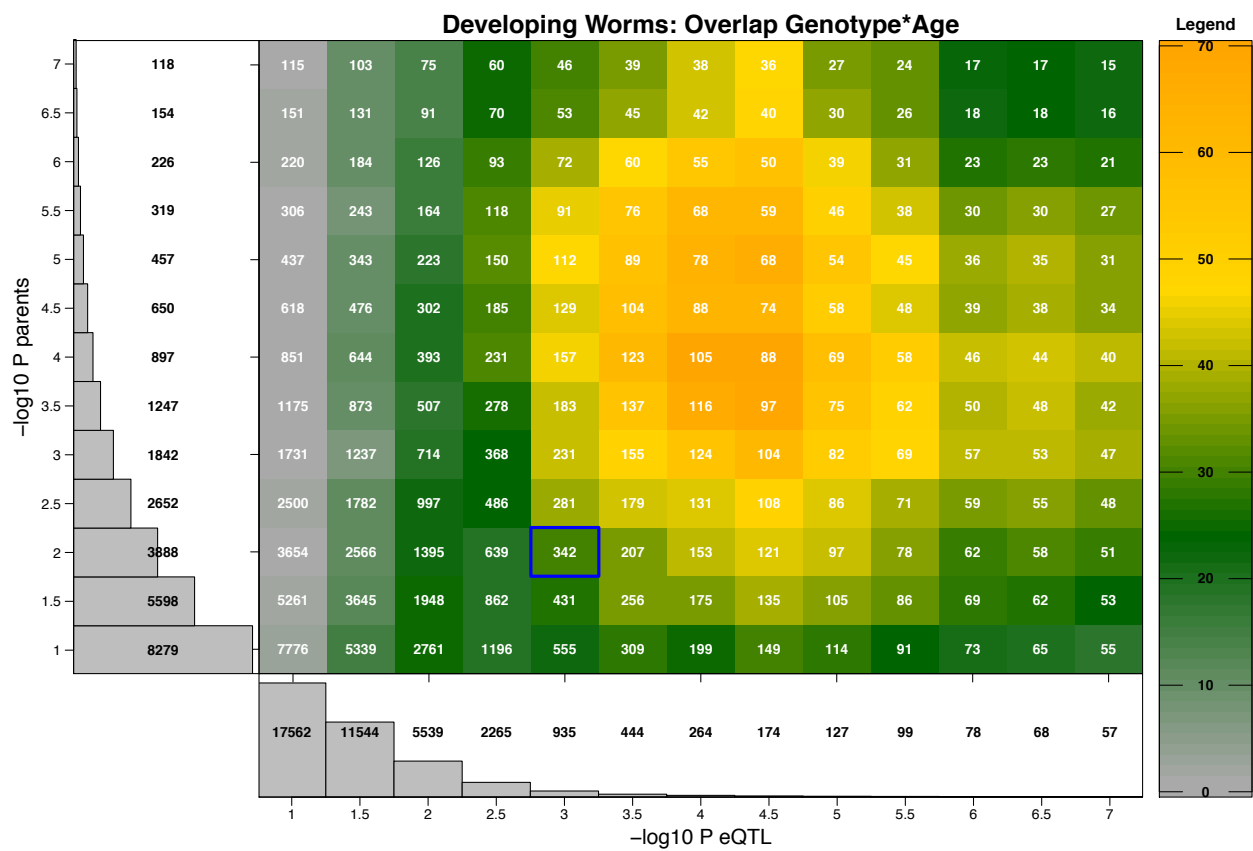

**Figure S2** Number of overlapping genes between differentially expressed genes in the parental strains and with at least an eQTL at different thresholds in developing worms with genotype\*age interacting effect. See Figure S1 legend for details.

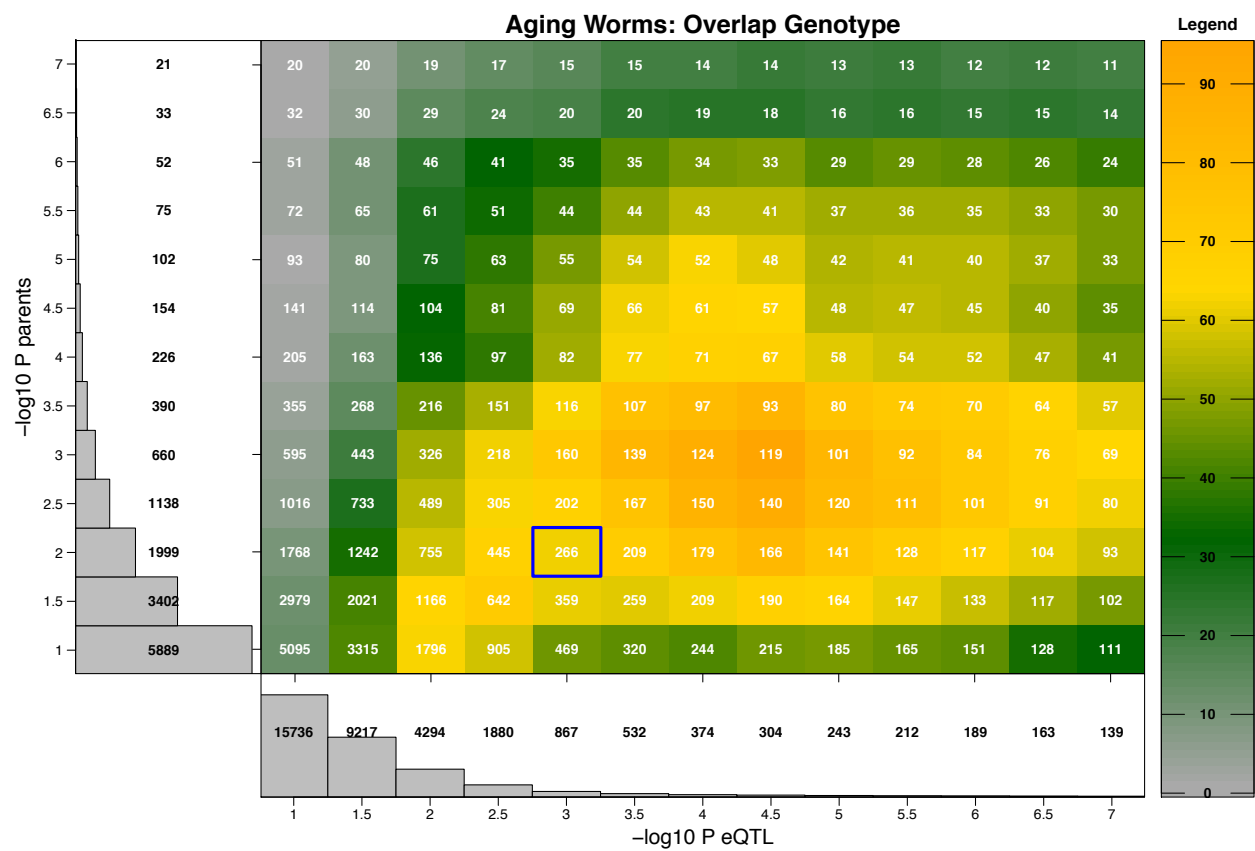

**Figure S3** Number of overlapping genes between differentially expressed genes in the parental strains and with at least an eQTL at different thresholds in old worms with genotype effect. See Figure S1 legend for details.

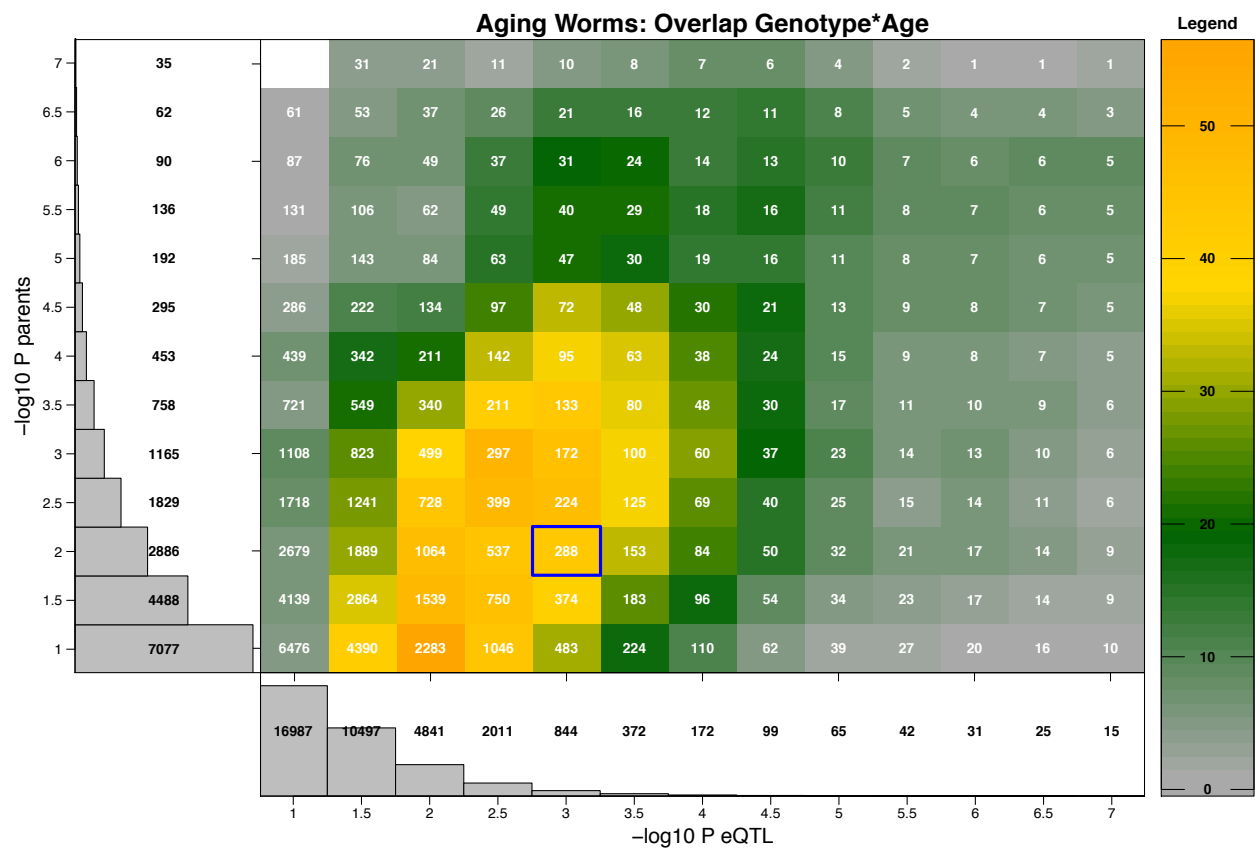

**Figure S4** Number of overlapping genes between differentially expressed genes in the parental strains and with at least an eQTL at different thresholds in old worms with genotype\*age interacting effect. See Figure S1 legend for details.

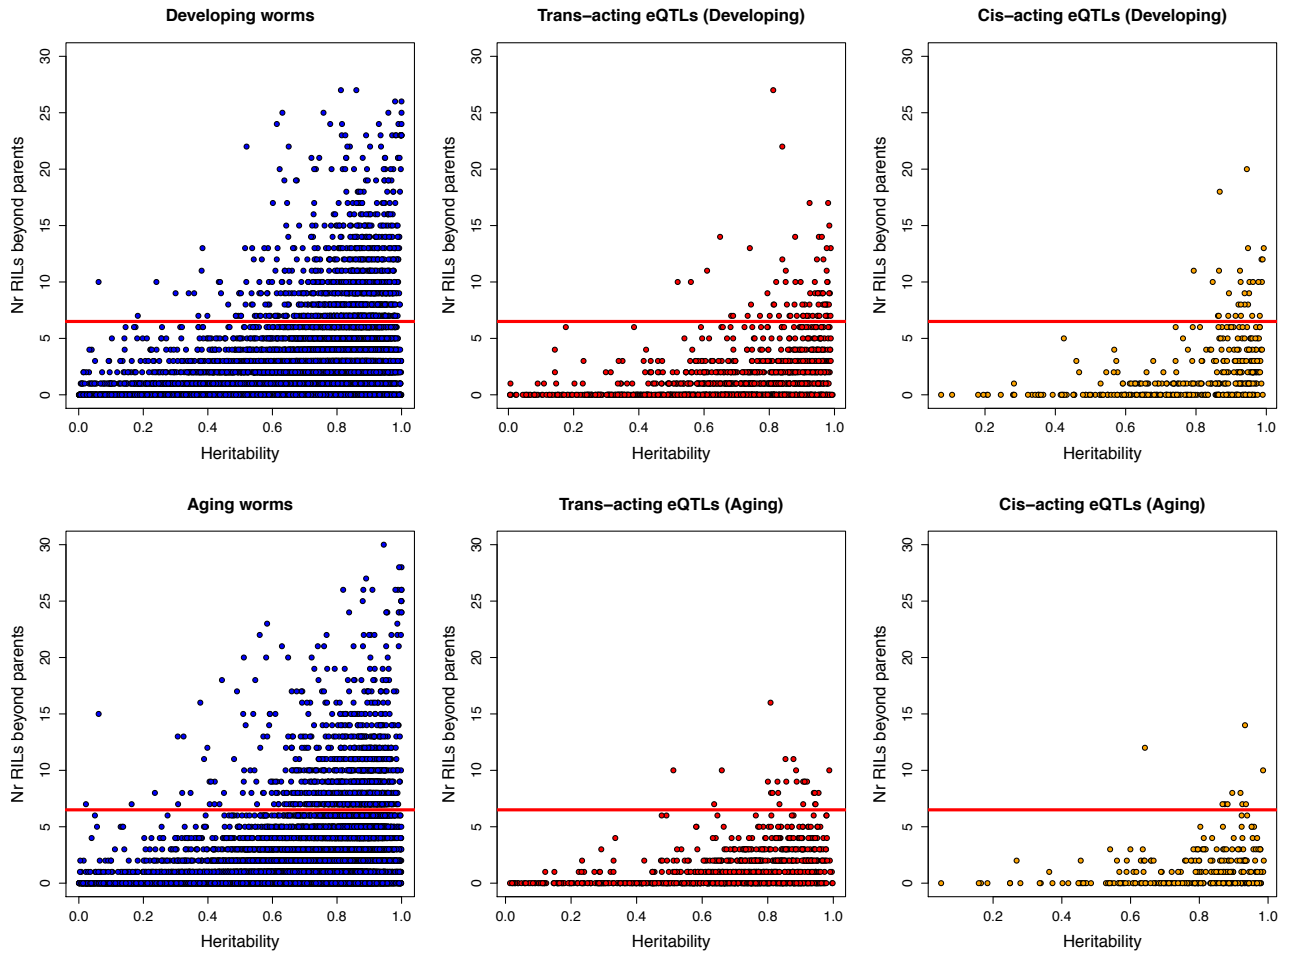

**Figure S5** Transgressive segregation, heritability and eQTLs. Upper graphs show values for developing worms, lower graphs for aging worms. Left graphs (upper and lower) show the number of RILs which expression values transgress from the higher or lower parent value (*y-axis*) versus their heritability values (*x-axis*). Middle and right graphs plot the number of genes with eQTLs (*trans*-acting middle, *cis*-acting right) detected, their heritability values and their transgressive segregants. We detected more transgressive segregation in genes with *trans*-acting regulation and in developing worms than in aging worms and *cis*-acting eQTLs. Red line indicates the threshold for significant transgressive segregation.

Tables S1 –S8 are available for download at  
<http://www.g3journal.org/lookup/suppl/doi:10.1534/g3.112.002212/-/DC1>.

**Table S1** List of differentially expressed genes between N2 and CB4856 in juvenile (t1), reproductive (t2) and old worms (t3). Genes with a  $-\log_{10}$  P-value  $> 2$  in a linear model 1 (gene expression = marker (effect) + error) were considered significant. Array ID = identification number for microarray spot. CDS name = coding sequence name. Gene name = public gene name. P-value =  $-\log_{10}$  P-value for the significant test.

**Table S2** List of differentially expressed genes between N2 and CB4856 in developing (t1 vs. t2) and aging worms (t2 vs. t3). Genes with a  $-\log_{10}$  P-value  $> 2$  in a linear model 1 (gene expression = marker(effect) + physiological age + interaction (marker\*physiological age) + error) were considered significant. *Array ID* = identification number for microarray spot. *CDS name* = coding sequence name. *Gene name* = public gene name. *P-value* =  $-\log_{10}$  P-value for the significant test. Worksheets = *Developing (marker)* for genes differentially regulated by genotype in developing worms; *Developing (marker-age)* for genes differentially regulated by genotype\*age interaction in developing worms; *Aging (marker)* for genes differentially regulated by genotype in aging worms; *Aging (marker-age)* for genes differentially regulated by genotype\*age interaction in aging worms.

**Table S3** Significantly enriched Gene Ontology (GO) terms and functional domains. *GO terms worksheets* contain full GO enriched analysis for differentially expressed genes between parental strains in developing and aging worms, genotype effect and genotype\*age interacting effect. *GO terms* are the GO id numbers. Total genes are the total number of genes in *C. elegans* assigned to each GO term. *Number of genes* are the number of regulated genes by genotype or genotype\*age in each GO term. *P-values* were calculated using hypergeometric test, values lower than 0.01 and more than two genes in a category were considered significant. The hypergeometric test compared a group of 2779 GO terms, with 18,312 annotated genes. Gene annotation with GO terms was extracted from Wormbase release WB210.

**Table S4** Table with GO enrichment analysis of overlapping genes between differentially expressed genes in the parental strains with at least an eQTL in developing and aging worms.

**Table S5** Table with GO enrichment analysis of highly heritable genes in developing and aging worms.

**Table S6** Table summary with GO terms enrichment analysis summary for highly heritable genes in developing and aging worms. First table shows GO terms significantly enriched in both groups of genes with a P-value  $< 0.01$ . Second table shows GO terms significantly enriched (P-value  $< 0.01$ ) in developing worm but not in aging worms. Third table shows GO terms significantly enriched (P-value  $< 0.01$ ) in aging worms but not in developing worms.

**Table S7** Excel file with genes showing signs of transgressive segregation, but without high heritability in developing worms in one spreadsheet. GO enrichment analysis of the genes is shown in the other spreadsheet.

**Table S8** Excel file with genes showing signs of transgressive segregation, but without high heritability in aging worms in one spreadsheet. GO enrichment analysis of the genes is shown in the other spreadsheet.

**Table S6 Table summary with GO terms enrichment analysis summary for highly heritable genes in developing and aging worms.** First table shows GO terms significantly enriched in both groups of genes with a P-value < 0.01. Second table shows GO terms significantly enriched (P-value < 0.01) in developing worms genes but not in aging worms. Third table shows GO terms significantly enriched (P-value < 0.01) in aging worms genes but not in developing worms

| Common Go Terms enriched in Developing and Aging worms highly heritable genes |             |       |         |                                                    |
|-------------------------------------------------------------------------------|-------------|-------|---------|----------------------------------------------------|
| GO terms                                                                      | Genes in GO | Genes | P-value | Description                                        |
| GO:0004030                                                                    | 4           | 4     | 0       | aldehyde dehydrogenase [NAD(P)+] activity          |
| GO:0006081                                                                    | 4           | 4     | 0       | cellular aldehyde metabolic process                |
| GO:0016763                                                                    | 6           | 6     | 0       | transferase activity, transferring pentosyl groups |
| GO:0051020                                                                    | 6           | 6     | 0       | GTPase binding                                     |
| GO:0042302                                                                    | 309         | 191   | 0.00266 | structural constituent of cuticle                  |

| Go Terms enriched only in Developing worms highly heritable genes |             |       |          |                                                              |
|-------------------------------------------------------------------|-------------|-------|----------|--------------------------------------------------------------|
| GO terms                                                          | Genes in GO | Genes | P-value  | Description                                                  |
| GO:0000795                                                        | 4           | 4     | 0        | synaptonemal complex                                         |
| GO:0006544                                                        | 4           | 4     | 0        | glycine metabolic process                                    |
| GO:0007611                                                        | 4           | 4     | 0        | learning or memory                                           |
| GO:0008176                                                        | 4           | 4     | 0        | tRNA (guanine-N7-)-methyltransferase activity                |
| GO:0016328                                                        | 4           | 4     | 0        | lateral plasma membrane                                      |
| GO:0016358                                                        | 4           | 4     | 0        | dendrite development                                         |
| GO:0016471                                                        | 4           | 4     | 0        | vacuolar proton-transporting V-type ATPase complex           |
| GO:0018738                                                        | 4           | 4     | 0        | S-formylglutathione hydrolase activity                       |
| GO:0045773                                                        | 4           | 4     | 0        | positive regulation of axon extension                        |
| GO:0060102                                                        | 4           | 4     | 0        | collagen and cuticulin-based cuticle extracellular matrix    |
| GO:0000104                                                        | 5           | 5     | 0        | succinate dehydrogenase activity                             |
| GO:0005581                                                        | 5           | 5     | 0        | collagen                                                     |
| GO:0003896                                                        | 6           | 6     | 0        | DNA primase activity                                         |
| GO:0006269                                                        | 6           | 6     | 0        | DNA replication, synthesis of RNA primer                     |
| GO:0030071                                                        | 6           | 6     | 0        | regulation of mitotic metaphase/anaphase transition          |
| GO:0044249                                                        | 6           | 6     | 0        | cellular biosynthetic process                                |
| GO:0004926                                                        | 9           | 9     | 0        | non-G-protein coupled 7TM receptor activity                  |
| GO:0005744                                                        | 8           | 7     | 0.007421 | mitochondrial inner membrane presequence translocase complex |
| GO:0015085                                                        | 8           | 7     | 0.007421 | calcium ion transmembrane transporter activity               |
| GO:0016538                                                        | 8           | 7     | 0.007421 | cyclin-dependent protein kinase regulator activity           |
| GO:0032580                                                        | 8           | 7     | 0.007421 | Golgi cisterna membrane                                      |

|            |     |     |          |                                      |
|------------|-----|-----|----------|--------------------------------------|
| GO:0005388 | 12  | 11  | 0.000639 | calcium-transporting ATPase activity |
| GO:0005604 | 14  | 12  | 0.002407 | basement membrane                    |
| GO:0000776 | 14  | 13  | 0.000187 | kinetochore                          |
| GO:0004091 | 17  | 14  | 0.003357 | carboxylesterase activity            |
| GO:0008233 | 50  | 35  | 0.007561 | peptidase activity                   |
| GO:0005198 | 297 | 181 | 0.007627 | structural molecule activity         |
| GO:0010171 | 734 | 428 | 0.009828 | body morphogenesis                   |

---

Go Terms enriched only in Aging worms highly heritable genes

---

| GO terms   | Genes<br>in GO | Genes | P-value  | Description                                                          |
|------------|----------------|-------|----------|----------------------------------------------------------------------|
| GO:0015485 | 4              | 4     | 0        | cholesterol binding                                                  |
| GO:0004657 | 6              | 5     | 0.004131 | proline dehydrogenase activity                                       |
| GO:0004768 | 5              | 5     | 0        | stearoyl-CoA 9-desaturase activity                                   |
| GO:0006562 | 6              | 5     | 0.004131 | proline catabolic process                                            |
| GO:0006937 | 6              | 5     | 0.004131 | regulation of muscle contraction                                     |
| GO:0010085 | 6              | 5     | 0.004131 | polarity specification of proximal/distal axis                       |
| GO:0032504 | 5              | 5     | 0        | multicellular organism reproduction                                  |
| GO:0006537 | 8              | 6     | 0.008598 | glutamate biosynthetic process                                       |
| GO:0004611 | 8              | 7     | 0.000662 | phosphoenolpyruvate carboxykinase activity                           |
| GO:0005882 | 8              | 7     | 0.000662 | intermediate filament                                                |
| GO:0006505 | 9              | 7     | 0.00384  | GPI anchor metabolic process                                         |
| GO:0017076 | 8              | 7     | 0.000662 | purine nucleotide binding                                            |
| GO:0043073 | 9              | 7     | 0.00384  | germ cell nucleus                                                    |
| GO:0004368 | 10             | 8     | 0.001697 | glycerol-3-phosphate dehydrogenase activity                          |
| GO:0009331 | 10             | 8     | 0.001697 | glycerol-3-phosphate dehydrogenase complex                           |
| GO:0034607 | 11             | 8     | 0.005989 | turning behavior involved in mating                                  |
| GO:0004652 | 12             | 9     | 0.002843 | polynucleotide adenylyltransferase activity                          |
| GO:0006072 | 13             | 9     | 0.007881 | glycerol-3-phosphate metabolic process                               |
| GO:0043631 | 12             | 9     | 0.002843 | RNA polyadenylation                                                  |
| GO:0005262 | 15             | 10    | 0.009457 | calcium channel activity                                             |
| GO:0006094 | 13             | 11    | 0.000139 | gluconeogenesis                                                      |
| GO:0016831 | 25             | 16    | 0.004391 | carboxy-lyase activity                                               |
| GO:0031625 | 26             | 16    | 0.007977 | ubiquitin protein ligase binding                                     |
| GO:0000122 | 27             | 17    | 0.004688 | negative regulation of transcription from RNA polymerase II promoter |
| GO:0004518 | 34             | 23    | 0.000305 | nuclease activity                                                    |
| GO:0001703 | 74             | 40    | 0.005349 | gastrulation with mouth forming first                                |
| GO:0004713 | 809            | 359   | 0.004876 | protein tyrosine kinase activity                                     |

|            |      |     |          |                                          |
|------------|------|-----|----------|------------------------------------------|
| GO:0004672 | 902  | 403 | 0.001747 | protein kinase activity                  |
| GO:0004674 | 958  | 427 | 0.001619 | protein serine/threonine kinase activity |
| GO:0006468 | 1013 | 452 | 0.001099 | protein amino acid phosphorylation       |
| GO:0005524 | 2060 | 879 | 0.00497  | ATP binding                              |
| GO:0009790 | 2334 | 992 | 0.004822 | embryonic development                    |

---
